# Supplementary material for: Label-free visualization of photosynthetic microbial biofilms using mid-infrared photothermal and autofluorescence imaging
Source: Royal Society of Chemistry journal article supplement (doi:10.1039/d3an01453c), 2023-01-01
Supplement: d3an01453c1.pdf [file d3an01453c1.pdf]

Supporting Information

# Label-Free Visualization of Photosynthetic Microbial Biofilms using Mid-Infrared Photothermal and Autofluorescence Imaging

Ryo Kato,<sup>1, 2, 3, \*</sup> Kaisei Maeda,<sup>4, \*</sup> Taka-aki Yano,<sup>1, 2, 3</sup> Kan Tanaka,<sup>4</sup> and Takuo Tanaka<sup>1, 2, 3,</sup>

<sup>1</sup> Institute of Post-LED Photonics, Tokushima University, 2-1 Minamijosanjima-cho,  
Tokushima, Tokushima 770-0856, Japan

<sup>2</sup> Innovative Photon Manipulation Research Team, RIKEN Center for Advanced Photonics,  
Wako, Saitama 351-0198, Japan

<sup>3</sup> Metamaterials Laboratory, RIKEN Cluster for Pioneering Research, Wako, Saitama 351-0198,  
Japan

<sup>4</sup> Laboratory for Chemistry and Life Science, Institute of Innovative Research, Tokyo Institute  
of Technology, Midori-Ku, Yokohama, Kanagawa 226-8503, Japan

\* Corresponding authors: [kato.ryo@tokushima-u.ac.jp](mailto:kato.ryo@tokushima-u.ac.jp)  
[kmaeda@res.titech.ac.jp](mailto:kmaeda@res.titech.ac.jp)

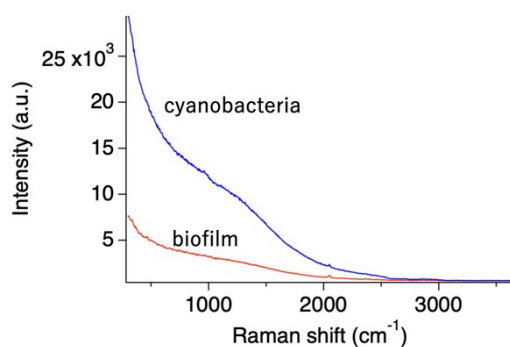

Figure S1. Raman spectra of cyanobacteria and their biofilms excited by incident light with a wavelength of 532 nm.

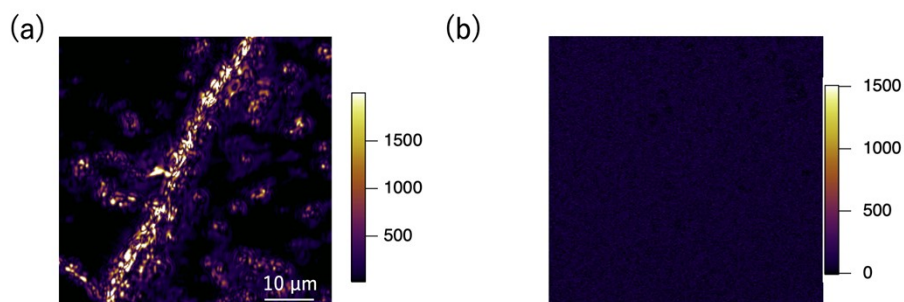

Figure S2. (a) MIP image of biofilms at  $1550\text{ cm}^{-1}$ , mainly derived from amide II band of proteins. (b) MIP image of biofilms at  $1180\text{ cm}^{-1}$ , which is the off resonant IR wavenumber.

Table S1. Comparison of performance of MIP and other vibrational imaging techniques.

| Techniques           | Imaging speed                  | Spatial resolution                            | Input power<br>(visible)            | Fluorescence<br>interference |
|----------------------|--------------------------------|-----------------------------------------------|-------------------------------------|------------------------------|
| MIP (our work)       | 10 min<br>(90000 pixels)       | $0.3\sim 0.5\text{ }\mu\text{m}$<br>(Typical) | $<1.0\times 10^2\text{ kW/cm}^{-1}$ | No                           |
| Raman <sup>1,2</sup> | 40 min<br>(2500 pixels)        | $0.3\sim 0.5\text{ }\mu\text{m}$<br>(Typical) | $<1.0\times 10^4\text{ kW/cm}^{-1}$ | Yes                          |
| FTIR <sup>3-5</sup>  | Tens of min –<br>several hours | $>10\text{ }\mu\text{m}$                      | –                                   | No                           |

\* We would like to mention here that the comparison described above was made with the only references and the performance of each imaging technique depends on instruments, samples, and so on.

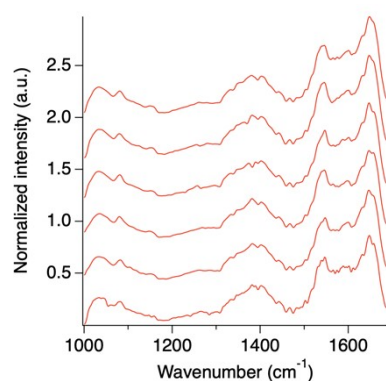

Figure S3. MIP spectra of cyanobacteria in biofilm matrix continuously recorded 6 times

## References

- 1 H. N. Noothalapati Venkata, N. Nomura and S. Shigeto, *J. Raman Spectrosc.*, 2011, **42**, 1913–1915.
- 2 R. Kato, T. Yano, T. Minamikawa and T. Tanaka, *Anal. Sci.*, 2022, **38**, 1497–1503.
- 3 J. L. Xu, K. V. Thomas, Z. Luo and A. A. Gowen, *TrAC - Trends Anal. Chem.*, 2019, **119**, 115629.
- 4 E. Levenson, P. Lerch and M. C. Martin, *Infrared Phys. Technol.*, 2006, **49**, 45–52.
- 5 T. P. Wrobel, P. Mukherjee and R. Bhargava, *Analyst*, 2017, **142**, 75–79.
